# Supplementary material
Source: PubMed Central journal article supplement (PMC2770326)
Supplement: cwp115_1.pdf [file cwp115_1.pdf]

# Metabolic Glycoengineering: Sialic Acid and Beyond

*Jian Du, M. Adam Meledeo, Zhiyun Wang, Hargun S. Khanna, Venkata D. P. Paruchuri,  
and Kevin J. Yarema\**

Department of Biomedical Engineering, The Johns Hopkins University, Baltimore, MD 21218

\* Corresponding author:

Clark Hall 106A  
3400 North Charles Avenue  
Baltimore, Maryland 21218

Email: [kyarema1@jhu.edu](mailto:kyarema1@jhu.edu)

Phone: 410.516.4914

Fax: 410.516.8152

## **This document provides:**

- (1) A list of the full names of enzymes mentioned in the main text and the figures therein (in Table S1 on Page S2).
- (2) a compilation of analogs that intercept the sialic acid pathway and supporting reference (in Table S2 on Page S4).
- (3) References (on Page S7).

**Table S1. Enzymes depicted in the figures and mentioned in the text.**

| Symbol  | Name                                                                                                                                                          | EC Number             | HGNC ID Number |
|---------|---------------------------------------------------------------------------------------------------------------------------------------------------------------|-----------------------|----------------|
| CMAH    | Cytidine monophospho- <i>N</i> -acetylneuraminic acid monooxygenase (or CMP- <i>N</i> -acetylneuraminic acid, NAD(P)H: oxygen oxidoreductase (hydroxylating)) | 1.14.18.2             | 2098           |
| CMAS    | Cytidine monophospho- <i>N</i> -acetylneuraminic acid synthetase                                                                                              | 2.7.7.43              | 18290          |
| CMPNT   | CMP-Neu5Ac transporter (the anti-port Golgi transporter)                                                                                                      |                       |                |
| DPAGT1  | Dolichyl-phosphate (UDP- <i>N</i> -acetylglucosamine) <i>N</i> -acetylglucosaminophosphotransferase 1 (GlcNAc-1-P transferase)                                | 2.7.8.15              | 2995           |
| FPGT    | Fucose-1-phosphate guanylyltransferase                                                                                                                        | 2.7.7.30              | 3825           |
| FUK     | Fucokinase                                                                                                                                                    | 2.7.1.52              | 29500          |
| GALE    | UDP- <i>N</i> -acetylglucosamine 4-epimerase                                                                                                                  | 5.1.3.2               | 4116           |
| GALK2   | <i>N</i> -Acetylgalactosamine 1-kinase; galactokinase 2                                                                                                       | 2.7.1.157             | 4119           |
| GALNT   | Polypeptide <i>N</i> -acetylgalactosaminyltransferase                                                                                                         | 2.4.1.41              |                |
| GNE     | Glucosamine (UDP- <i>N</i> -acetyl)-2-epimerase/ <i>N</i> -acetylmannosamine kinase                                                                           | 5.1.3.14/<br>2.7.1.60 | 23657          |
| GNPNAT1 | Glucosamine-phosphate <i>N</i> -acetyltransferase 1                                                                                                           | 2.3.1.4               | 19980          |
| KL      | Klotho; $\beta$ -glucuronidase and putative sialidase (as discussed in (Cha et al. 2008, Kuro-o 2009))                                                        | 3.2.1.18/<br>3.2.1.21 | 6344           |
| MGAT1   | Mannosyl ( $\alpha$ 1,3-)-glycoprotein $\beta$ 1,2- <i>N</i> -acetylglucosaminyltransferase                                                                   | 2.4.1.101             | 7044           |
| MGAT2   | Mannosyl ( $\alpha$ 1,6-)-glycoprotein $\beta$ 1,2- <i>N</i> -acetylglucosaminyltransferase                                                                   | 2.4.1.143             | 7045           |
| MGAT3   | Mannosyl ( $\beta$ 1,4-)-glycoprotein $\beta$ 1,4- <i>N</i> -acetylglucosaminyltransferase                                                                    | 2.4.1.144             | 7046           |
| MGAT4A  | Mannosyl ( $\alpha$ 1,3-)-glycoprotein $\beta$ 1,4- <i>N</i> -acetylglucosaminyltransferase, isozyme A                                                        | 2.4.1.145             | 7047           |
| MGAT4B  | Mannosyl ( $\alpha$ 1,3-)-glycoprotein $\beta$ 1,4- <i>N</i> -acetylglucosaminyltransferase, isozyme B                                                        | 2.4.1.145             | 7048           |
| MGAT4C  | Mannosyl ( $\alpha$ 1,3-)-glycoprotein $\beta$ 1,4- <i>N</i> -acetylglucosaminyltransferase, isozyme C (putative)                                             | 2.4.1.145             | 30871          |
| MGAT5   | Mannosyl ( $\alpha$ 1,6-)-glycoprotein $\beta$ 1,6- <i>N</i> -acetylglucosaminyltransferase                                                                   | 2.4.1.155             | 7049           |
| MGAT5B  | Mannosyl ( $\alpha$ 1,6-)-glycoprotein $\beta$ 1,6- <i>N</i> -acetylglucosaminyltransferase, isozyme B                                                        | 2.4.1.-               | 24140          |
| NANP    | <i>N</i> -Acetylneuraminic acid phosphatase                                                                                                                   | 3.1.3.29              | 16140          |
| NANS    | <i>N</i> -Acetylneuraminic acid synthase (sialic acid synthase)                                                                                               | 2.5.1.57              | 19237          |
| NEU1    | Sialidase 1 (lysosomal sialidase)                                                                                                                             | 3.2.1.18              | 7758           |
| NEU2    | Sialidase 2 (cytosolic sialidase)                                                                                                                             | 3.2.1.18              | 7759           |
| NEU3    | Sialidase 3 (membrane sialidase)                                                                                                                              | 3.2.1.18              | 7760           |
| NEU4    | Sialidase 4                                                                                                                                                   | 3.2.1.18              | 21328          |
| OGT     | O-Linked <i>N</i> -acetylglucosamine (GlcNAc) transferase (UDP- <i>N</i> -acetylglucosamine:polypeptide- <i>N</i> -acetylglucosaminyl transferase)            | 2.4.1.94              | 8127           |
| PGM3    | Phosphoacetylglucosamine mutase                                                                                                                               | 5.4.2.3               | 8907           |
| RENBP   | <i>N</i> -Acetylglucosamine 2-epimerase (renin-binding protein)                                                                                               | 5.1.3.8               | 9959           |
| SAC     | Sialic acid cyclase, as proposed by Kannagi and colleagues (Mitsuoka et al. 1999, Kannagi 2002)                                                               |                       |                |

|             |                                                                                                                                            |          |       |
|-------------|--------------------------------------------------------------------------------------------------------------------------------------------|----------|-------|
| SANAE       | <i>Sialic acid de-N-acetylase (Hanai et al. 1988)</i>                                                                                      |          |       |
| ST3GAL1     | ST3 $\beta$ -galactoside $\alpha$ 2,3-sialyltransferase 1                                                                                  | 2.4.99.4 | 10862 |
| ST3GAL2     | ST3 $\beta$ -galactoside $\alpha$ 2,3-sialyltransferase 2                                                                                  | 2.4.99.4 | 10863 |
| ST3GAL3     | ST3 $\beta$ -galactoside $\alpha$ 2,3-sialyltransferase 3                                                                                  | 2.4.99.6 | 10866 |
| ST3GAL4     | ST3 $\beta$ -galactoside $\alpha$ 2,3-sialyltransferase 4                                                                                  | 2.4.99.4 | 10864 |
| ST3GAL5     | ST3 $\beta$ -galactoside $\alpha$ 2,3-sialyltransferase 5                                                                                  | 2.4.99.9 | 10872 |
| ST3GAL6     | ST3 $\beta$ -galactoside $\alpha$ 2,3-sialyltransferase 6                                                                                  | 2.4.99.- | 18080 |
| ST6GAL1     | ST6 $\beta$ -galactosamide $\alpha$ 2,6-sialyltransferase 1                                                                                | 2.4.99.1 | 10860 |
| ST6GAL2     | ST6 $\beta$ -galactosamide $\alpha$ 2,6-sialyltransferase 2                                                                                | 2.4.99.2 | 10861 |
| ST6GALNAC1  | ST6 ( $\alpha$ - <i>N</i> -acetylneuraminyl-2,3- $\beta$ -galactosyl-1,3)- <i>N</i> -acetylglactosaminide $\alpha$ 2,6-sialyltransferase 1 | 2.4.99.3 | 23614 |
| ST6GALNAC2  | ST6 ( $\alpha$ - <i>N</i> -acetylneuraminyl-2,3- $\beta$ -galactosyl-1,3)- <i>N</i> -acetylglactosaminide $\alpha$ 2,6-sialyltransferase 2 | 2.4.99.7 | 10867 |
| ST6GALNAC3  | ST6 ( $\alpha$ - <i>N</i> -acetylneuraminyl-2,3- $\beta$ -galactosyl-1,3)- <i>N</i> -acetylglactosaminide $\alpha$ 2,6-sialyltransferase 3 | 2.4.99.- | 19343 |
| ST6GALNAC4  | ST6 ( $\alpha$ - <i>N</i> -acetylneuraminyl-2,3- $\beta$ -galactosyl-1,3)- <i>N</i> -acetylglactosaminide $\alpha$ 2,6-sialyltransferase 4 | 2.4.99.7 | 17846 |
| ST6GALNAC5  | ST6 ( $\alpha$ - <i>N</i> -acetylneuraminyl-2,3- $\beta$ -galactosyl-1,3)- <i>N</i> -acetylglactosaminide $\alpha$ 2,6-sialyltransferase 5 | 2.4.99.- | 19342 |
| ST6GALNAC6  | ST6 ( $\alpha$ - <i>N</i> -acetylneuraminyl-2,3- $\beta$ -galactosyl-1,3)- <i>N</i> -acetylglactosaminide $\alpha$ 2,6-sialyltransferase 6 | 2.4.99.- | 23364 |
| ST8SIA1     | ST8 $\alpha$ - <i>N</i> -acetylneuraminide $\alpha$ 2,8-sialyltransferase 1                                                                | 2.4.99.8 | 10869 |
| ST8SIA2     | ST8 $\alpha$ - <i>N</i> -acetylneuraminide $\alpha$ 2,8-sialyltransferase 2                                                                | 2.4.99.- | 10870 |
| ST8SIA3     | ST8 $\alpha$ - <i>N</i> -acetylneuraminide $\alpha$ 2,8-sialyltransferase 3                                                                | 2.4.99.- | 14269 |
| ST8SIA4     | ST8 $\alpha$ - <i>N</i> -acetylneuraminide $\alpha$ 2,8-sialyltransferase 4                                                                | 2.4.99.- | 10871 |
| ST8SIA5     | ST8 $\alpha$ - <i>N</i> -acetylneuraminide $\alpha$ 2,8-sialyltransferase 5                                                                | 2.4.99.- | 17827 |
| ST8SIA6     | ST8 $\alpha$ - <i>N</i> -acetylneuraminide $\alpha$ 2,8-sialyltransferase 6                                                                | 2.4.99.8 | 23317 |
| UAP1 (AGX1) | UDP- <i>N</i> -acteylglucosamine pyrophosphorylase 1                                                                                       | 2.7.7.23 | 12457 |

**Table S2(a). Compilation of representative ManNAc analogs and references.**

| 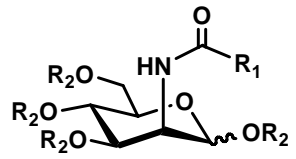   |                                                    | <b>ManNAc Analogs</b>       |                                                        |
|-------------------------------------------------------------------------------------|----------------------------------------------------|-----------------------------|--------------------------------------------------------|
| <b>R<sub>1</sub></b>                                                                | <b>R<sub>2</sub></b>                               | <b>Name</b>                 | <b>Reference(s)</b>                                    |
| <b>Analogs with alkyl N-acyl groups</b>                                             |                                                    |                             |                                                        |
| -CH <sub>3</sub>                                                                    | -H                                                 | ManNAc                      |                                                        |
| -CH <sub>2</sub> CH <sub>3</sub>                                                    | -H                                                 | ManNProp                    | (Kayser et al. 1992)                                   |
| -(CH <sub>2</sub> ) <sub>2</sub> CH <sub>3</sub>                                    | -H                                                 | ManNBut                     | (Kayser et al. 1992)                                   |
| -(CH <sub>2</sub> ) <sub>3</sub> CH <sub>3</sub>                                    | -H                                                 | ManNPent                    | [(Kayser et al. 1992)                                  |
| -(CH <sub>2</sub> ) <sub>4</sub> CH <sub>3</sub>                                    | -H                                                 | ManNHex                     | (Goon et al. 2003)                                     |
| -(CH <sub>2</sub> ) <sub>5</sub> CH <sub>3</sub>                                    | -H                                                 | ManNHept                    | (Goon et al. 2003)                                     |
| -(CH <sub>2</sub> ) <sub>6</sub> CH <sub>3</sub>                                    | -H                                                 | ManNOct                     | (Goon et al. 2003)                                     |
| -CH <sub>3</sub>                                                                    | -COCH <sub>3</sub>                                 | Ac <sub>4</sub> ManNAc      | (Jones et al. 2004)                                    |
| -CH <sub>2</sub> CH <sub>3</sub>                                                    | -COCH <sub>3</sub>                                 | Ac <sub>4</sub> ManNProp    | (Jacobs et al. 2001, Kim et al. 2004)                  |
| -(CH <sub>2</sub> ) <sub>2</sub> CH <sub>3</sub>                                    | -COCH <sub>3</sub>                                 | Ac <sub>4</sub> ManNBut     | (Jacobs et al. 2001, Kim et al. 2004)                  |
| -(CH <sub>2</sub> ) <sub>3</sub> CH <sub>3</sub>                                    | -COCH <sub>3</sub>                                 | Ac <sub>4</sub> ManNPent    | (Lemieux et al. 1999)                                  |
| -(CH <sub>2</sub> ) <sub>4</sub> CH <sub>3</sub>                                    | -COCH <sub>3</sub>                                 | Ac <sub>4</sub> ManNHex     | (Jacobs et al. 2001, Kim et al. 2004)                  |
| -(CH <sub>2</sub> ) <sub>5</sub> CH <sub>3</sub>                                    | -COCH <sub>3</sub>                                 | Ac <sub>4</sub> ManNHept    | (Jacobs et al. 2001, Kim et al. 2004)                  |
| -(CH <sub>2</sub> ) <sub>6</sub> CH <sub>3</sub>                                    | -COCH <sub>3</sub>                                 | Ac <sub>4</sub> ManNOct     | (Jacobs et al. 2001)                                   |
| -CH <sub>3</sub>                                                                    | -COCH <sub>2</sub> CH <sub>3</sub>                 | Pr <sub>4</sub> ManNAc      | (Kim et al. 2004)                                      |
| -CH <sub>3</sub>                                                                    | -CO(CH <sub>2</sub> ) <sub>2</sub> CH <sub>3</sub> | Bu <sub>4</sub> ManNAc      | (Kim et al. 2004, Sampathkumar et al. 2006a)           |
| <b>N-Glycolyl and N-thioglycolyl analogs</b>                                        |                                                    |                             |                                                        |
| -CH <sub>2</sub> OH                                                                 | -H                                                 | ManNGc                      |                                                        |
| -CH <sub>2</sub> OH                                                                 | -COCH <sub>3</sub>                                 | Ac <sub>5</sub> ManNGc      | (Collins et al. 2000, Sampathkumar et al. 2006c)       |
| -CH <sub>2</sub> SCOCH <sub>3</sub>                                                 | -COCH <sub>3</sub>                                 | Ac <sub>5</sub> ManNTGc     | (Sampathkumar et al. 2006b, Sampathkumar et al. 2006c) |
| -(CH <sub>2</sub> ) <sub>2</sub> SCOCH <sub>3</sub>                                 | -COCH <sub>3</sub>                                 | Ac <sub>5</sub> ManNTPr     | K.J.Yarema, unpublished                                |
| -(CH <sub>2</sub> ) <sub>3</sub> SCOCH <sub>3</sub>                                 | -COCH <sub>3</sub>                                 | Ac <sub>5</sub> ManNTBu     | K.J.Yarema, unpublished                                |
| <b>Azide- and diazirine-containing analogs</b>                                      |                                                    |                             |                                                        |
| -CH <sub>2</sub> N <sub>3</sub>                                                     | -H                                                 | ManNAz                      | (Saxon and Bertozzi 2000, Saxon et al. 2002)           |
| -CH <sub>2</sub> N <sub>3</sub>                                                     | -COCH <sub>3</sub>                                 | Ac <sub>4</sub> ManNAz      | (Saxon and Bertozzi 2000, Saxon et al. 2002)           |
|  | -COCH <sub>3</sub>                                 | Ac <sub>4</sub> ManNDaz     | (Tanaka and Kohler 2008, Bond et al. 2009)             |
| <b>Ketone-containing analogs</b>                                                    |                                                    |                             |                                                        |
| -CH <sub>2</sub> COCH <sub>3</sub>                                                  | -H                                                 | -                           | (Jacobs et al. 2001)                                   |
| -CH <sub>2</sub> CH <sub>2</sub> COCH <sub>3</sub>                                  | -H                                                 | ManNLev                     | (Mahal et al. 1997, Jacobs et al. 2001)                |
| -CH <sub>2</sub> CH <sub>2</sub> COCH <sub>2</sub> CH <sub>3</sub>                  | -H                                                 | ManNHomoLev                 | (Kim et al. 2004)                                      |
| -CH <sub>2</sub> (CH <sub>2</sub> ) <sub>2</sub> COCH <sub>3</sub>                  | -H                                                 | ManNOxoHex                  | (Kim et al. 2004)                                      |
| -CH <sub>2</sub> (CH <sub>2</sub> ) <sub>3</sub> COCH <sub>3</sub>                  | -H                                                 | ManNOxoHept                 | (Kim et al. 2004)                                      |
| -CH <sub>2</sub> (CH <sub>2</sub> ) <sub>4</sub> COCH <sub>3</sub>                  | -H                                                 | ManNOxoOct                  | [(Kim et al. 2004)                                     |
| -CH <sub>2</sub> COCH <sub>3</sub>                                                  | -COCH <sub>3</sub>                                 | -                           | (Jacobs et al. 2001)                                   |
| -CH <sub>2</sub> CH <sub>2</sub> COCH <sub>3</sub>                                  | -COCH <sub>3</sub>                                 | Ac <sub>4</sub> ManLev      | (Lemieux et al. 1999, Jacobs et al. 2001)              |
| -CH <sub>2</sub> CH <sub>2</sub> COCH <sub>2</sub> CH <sub>3</sub>                  | -COCH <sub>3</sub>                                 | Ac <sub>4</sub> ManNHomoLev | (Jacobs et al. 2001, Kim et al. 2004)                  |
| -CH <sub>2</sub> (CH <sub>2</sub> ) <sub>2</sub> COCH <sub>3</sub>                  | -COCH <sub>3</sub>                                 | Ac <sub>4</sub> ManNOxoHex  | (Jacobs et al. 2001)[(Kim et al. 2004)                 |
| -CH <sub>2</sub> (CH <sub>2</sub> ) <sub>3</sub> COCH <sub>3</sub>                  | -COCH <sub>3</sub>                                 | Ac <sub>4</sub> ManNOxoHept | (Jacobs et al. 2001, Kim et al. 2004)                  |
| CH <sub>2</sub> (CH <sub>2</sub> ) <sub>4</sub> COCH <sub>3</sub>                   | -COCH <sub>3</sub>                                 | Ac <sub>4</sub> ManNOxoOct  | (Jacobs et al. 2001, Kim et al. 2004)                  |
| -CH <sub>2</sub> CH <sub>2</sub> COCH <sub>3</sub>                                  | -CO(CH <sub>2</sub> ) <sub>2</sub> CH <sub>3</sub> | Bu <sub>4</sub> ManNLev     | (Aich et al. 2008)                                     |
| <b>Miscellaneous</b>                                                                |                                                    |                             |                                                        |
| -CH <sub>2</sub> Ph                                                                 | -H                                                 | ManNPhAc                    | (Pan et al. 2004, Chefalo et al. 2006)                 |
| -CH(CH <sub>3</sub> ) <sub>2</sub>                                                  | -H                                                 | ManNiBu                     | (Pan et al. 2004, Chefalo et al. 2006)                 |
| -C(CH <sub>3</sub> ) <sub>3</sub>                                                   | -H                                                 | ManNPiv                     | (Pan et al. 2004, Chefalo et al. 2006)                 |
| -Ph                                                                                 | -H                                                 | ManNBz                      | (Pan et al. 2004, Chefalo et al. 2006)                 |
| -CH <sub>2</sub> CF <sub>3</sub>                                                    | -H                                                 | ManNTFP                     | (Pan et al. 2004, Chefalo et al. 2006)                 |
| -CH(CH <sub>3</sub> )CH <sub>2</sub> COCH <sub>3</sub>                              | -H                                                 | -                           | (Jacobs et al. 2001)                                   |

|                                                                                   |                    |                           |                                     |
|-----------------------------------------------------------------------------------|--------------------|---------------------------|-------------------------------------|
| -CH(CH <sub>3</sub> )CH <sub>2</sub> COCH <sub>3</sub>                            | -COCH <sub>3</sub> | -                         | (Jacobs et al. 2001)                |
| 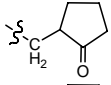 | -H                 | -                         | (Jacobs et al. 2001)                |
|  | -COCH <sub>3</sub> | -                         | (Jacobs et al. 2001)                |
| -CH=CHCH <sub>3</sub>                                                             | -H                 | -                         | (Keppler et al. 2001)               |
| -CH <sub>3</sub> CH <sub>2</sub> C≡CH (alkyne)                                    | -COCH <sub>3</sub> | Ac <sub>4</sub> ManNAkyne | {Sawa, 2006 #3293}{Hsu, 2007 #3445} |

**Table 2(b). Compilation of representative Neu5Ac analogs and references.**

|                                                                                     |                                           |                                                                                                       |
|-------------------------------------------------------------------------------------|-------------------------------------------|-------------------------------------------------------------------------------------------------------|
| 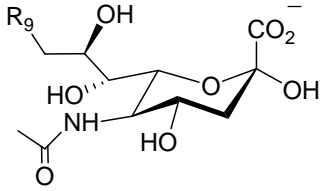   |                                           | <p><b>Sialic acid (Neu5Ac) analogs with modified C9OH (i.e., “R<sub>9</sub>”) groups</b></p>          |
| <b>R<sub>9</sub></b>                                                                | <b>Name</b>                               | <b>Reference(s)</b>                                                                                   |
| -OH                                                                                 | Neu5Ac                                    | (Oetke et al. 2002)                                                                                   |
| -H                                                                                  | 9-deoxy-Neu5Ac                            | (Oetke et al. 2002)                                                                                   |
| -NH <sub>2</sub>                                                                    | 9-amino-Neu5Ac                            | (Oetke et al. 2002)                                                                                   |
| -NHCOCH <sub>3</sub>                                                                | 9-acetamido-Neu5Ac                        | (Oetke et al. 2002)                                                                                   |
| -NHCOCH <sub>2</sub> NH <sub>2</sub>                                                | 9- <i>N</i> -Gly-Neu5Ac                   | (Oetke et al. 2002)                                                                                   |
| -NHCO(CH <sub>2</sub> ) <sub>2</sub> COOH                                           | 9- <i>N</i> -Succ-Neu5Ac                  | (Oetke et al. 2002)                                                                                   |
| -I                                                                                  | 9-Iodo-Neu5Ac                             | (Oetke et al. 2002)                                                                                   |
| -SH                                                                                 | 9-Thio-Neu5Ac                             | (Oetke et al. 2002)                                                                                   |
| -SCH <sub>3</sub>                                                                   | 9-SCH <sub>3</sub> -Neu5Ac                | (Oetke et al. 2002)                                                                                   |
| -SO <sub>2</sub> CH <sub>3</sub>                                                    | 9-SO <sub>2</sub> CH <sub>3</sub> -Neu5Ac | (Oetke et al. 2002)                                                                                   |
| -NHCOPhN <sub>3</sub>                                                               | 9-AAz-Neu5Ac                              | (Han et al. 2005)                                                                                     |
|  |                                           | <p><b>Sialic acid (Neu5Ac) analogs with modified <i>N</i>-acyl (i.e., “R<sub>5</sub>”) groups</b></p> |
| <b>R<sub>5</sub></b>                                                                | <b>Name</b>                               | <b>Reference(s)</b>                                                                                   |
| -COCH <sub>3</sub>                                                                  | Neu5Ac                                    | (Oetke et al. 2002)                                                                                   |
| -COCH <sub>2</sub> F                                                                | 5- <i>N</i> -Fluoroac-Neu                 | (Oetke et al. 2002)                                                                                   |
| -COCF <sub>3</sub>                                                                  | 5- <i>N</i> -Trifluoroac-Neu              | (Oetke et al. 2002)                                                                                   |
| -COCH <sub>2</sub> NH <sub>2</sub>                                                  | 5- <i>N</i> -Gly-Neu                      | (Oetke et al. 2002)                                                                                   |
| -CO(CH <sub>2</sub> ) <sub>2</sub> COOH                                             | 5- <i>N</i> -Succ-Neu                     | (Oetke et al. 2002)                                                                                   |
| -CSCH <sub>3</sub>                                                                  | 5- <i>N</i> -thioac-Neu                   | (Oetke et al. 2002)                                                                                   |
| -CO(CH <sub>2</sub> ) <sub>2</sub> COCH <sub>3</sub>                                | Sia5Lev                                   | (Chefalo et al. 2004)                                                                                 |
| -CO(CH <sub>2</sub> ) <sub>3</sub> COCH <sub>3</sub>                                | Sia5OxoHex                                | (Chefalo et al. 2004)                                                                                 |
| -CO(CH <sub>2</sub> ) <sub>4</sub> COCH <sub>3</sub>                                | Sia5OxoHept                               | (Chefalo et al. 2004)                                                                                 |
| -COCH <sub>2</sub> N <sub>3</sub>                                                   | Sia5Az                                    | (Chefalo et al. 2004)                                                                                 |
| -COCH <sub>2</sub> PhN <sub>3</sub>                                                 | Sia5PhAz                                  | (Chefalo et al. 2004)                                                                                 |
| -COCH <sub>2</sub> OH                                                               | Neu5Gc                                    | (Bardor et al. 2005, Tangvoranuntakul et al. 2003)                                                    |
| -COCH <sub>2</sub> PhN <sub>3</sub>                                                 | Sia5AAz                                   | {Tanaka, 2008 #4238}                                                                                  |

|                                                                                                                                                                                                                                                                                                                  |                                                                                                                                                                      |                                                                                                                                                                                                              |
|------------------------------------------------------------------------------------------------------------------------------------------------------------------------------------------------------------------------------------------------------------------------------------------------------------------|----------------------------------------------------------------------------------------------------------------------------------------------------------------------|--------------------------------------------------------------------------------------------------------------------------------------------------------------------------------------------------------------|
| -COCH <sub>2</sub> CH <sub>3</sub><br>-CO(CH <sub>2</sub> ) <sub>2</sub> CH <sub>3</sub><br>-CO(CH <sub>2</sub> ) <sub>3</sub> CH <sub>3</sub><br>-CO(CH <sub>2</sub> ) <sub>4</sub> CH <sub>3</sub><br>-CO(CH <sub>2</sub> ) <sub>5</sub> CH <sub>3</sub><br>-CO(CH <sub>2</sub> ) <sub>6</sub> CH <sub>3</sub> | Sia5Prop<br>Sia5But<br>Sia5Pent<br>Sia5Hex<br>Sia5Hept<br>Sia5Oct                                                                                                    | (Goon et al. 2003)<br>(Goon et al. 2003)                                                                             |
|                                                                                                                                                                                                                                                                                                                  |                                                                                                                                                                      | <b>Peracetylated, methylated sialic acid analogs with modified N-acyl (i.e., "R<sub>5</sub>") groups</b>                                                                                                     |
| <b>R<sub>5</sub></b>                                                                                                                                                                                                                                                                                             | <b>Name</b>                                                                                                                                                          | <b>Reference(s)</b>                                                                                                                                                                                          |
| -COCH <sub>3</sub><br>-COCH <sub>2</sub> COCH <sub>3</sub><br>-CO(CH <sub>2</sub> ) <sub>2</sub> COCH <sub>3</sub><br>-CO(CH <sub>2</sub> ) <sub>3</sub> COCH <sub>3</sub><br>-COCH <sub>2</sub> N <sub>3</sub><br>-COCH <sub>2</sub> PhN <sub>3</sub><br>                                                       | Ac <sub>5</sub> Neu5Ac<br>-<br>Ac <sub>5</sub> Sia5Lev<br>Ac <sub>5</sub> Sia5OxoHex<br>Ac <sub>5</sub> Sia5Az<br>Ac <sub>5</sub> Sia5AAz<br>Ac <sub>5</sub> Sia5DAz | (Luchansky et al. 2004)<br>(Luchansky et al. 2004)<br>(Tanaka and Kohler 2008, Bond et al. 2009) |

**Table 2(c).** CMP-sialic acid analogues used in MOE

|                                                      |                                          |                                                                                                    |                                                                   |
|------------------------------------------------------|------------------------------------------|----------------------------------------------------------------------------------------------------|-------------------------------------------------------------------|
|                                                      |                                          | <b>CMP-Sialic acid Analogs</b>                                                                     |                                                                   |
| <b>R<sub>9</sub></b>                                 | <b>R<sub>5</sub></b>                     | <b>Name</b>                                                                                        | <b>Ref</b>                                                        |
| -N <sub>3</sub><br>-NH <sub>3</sub> <sup>+</sup>     | -COCH <sub>3</sub><br>-COCH <sub>3</sub> | CMP-9-azido-Sia5Ac<br>CMP-9-amino-Sia5Ac                                                           | (Kosa and Gross 1993)<br>(Kosa and Gross 1993, Gross et al. 1989) |
| -NHAc                                                | -COCH <sub>3</sub>                       | CMP-9-acetamido-Sia5Ac                                                                             | (Kosa and Gross 1993, Gross et al. 1989)                          |
| -NHCSCH <sub>3</sub>                                 | -COCH <sub>3</sub>                       | CMP-9-thioacetamidoSia5Ac                                                                          | (Brossmer and Gross 1994, Gross et al. 1989)                      |
| -NHCOPh<br><i>N</i> -fluoresceinylyl<br>thioureide   | -COCH <sub>3</sub><br>-COCH <sub>3</sub> | CMP-9-benzamidoSia5Ac<br>CMP-9-deoxy-9- <i>N</i> -<br><i>N</i> -fluoresceinylyl) thioureido-Sia5Ac | (Brossmer and Gross 1994)                                         |
| -NHCO(CH <sub>2</sub> ) <sub>4</sub> CH <sub>3</sub> | -COCH <sub>3</sub>                       | CMP-9-hexanoylamidoSia5Ac                                                                          | (Gross et al. 1989)                                               |
| -OH                                                  | -COCH <sub>2</sub> NH <sub>3</sub>       | CMP-5- <i>N</i> - aminoacetylNeu5Ac                                                                | (Brossmer and Gross 1994)                                         |
| -OH                                                  | -CSCH <sub>3</sub>                       | CMP-5- <i>N</i> -thioacetylSia5Ac                                                                  | (Brossmer and Gross 1994)                                         |
| -OH                                                  | -CHO                                     | CMP-5- <i>N</i> -formylSia5Ac                                                                      | (Brossmer and Gross 1994)                                         |

## References

- Aich, U, Campbell, CT, Elmouelhi, N, Weier, CA, Sampathkumar, S-G, Choi, SS and Yarema, KJ. 2008. Regioisomeric SCFA attachment to hexosamines separates metabolic flux from cytotoxicity and MUC1 suppression. *ACS Chem Biol*, 3, 230-240.
- Bardor, M, Nguyen, DH, Diaz, S and Varki, A. 2005. Mechanism of uptake and incorporation of the non-human sialic acid *N*-glycolylneuraminic acid into human cells. *J Biol Chem*, 280, 4228-4237.
- Bond, MR, Zhang, H, Vu, PD and Kohler, JJ. 2009. Photocrosslinking of glycoconjugates using metabolically incorporated diazirine-containing sugars. *Nat Protoc*, 4, 1044 -1063
- Brossmer, R and Gross, HJ. 1994. Sialic acid analogs and application for preparation of neoglycoconjugates. *Meth Enzymol*, 247, 153-176.
- Cha, S-K, Ortega, B, Kurosu, H, Rosenblatt, KP, Kuro-o, M and Huang, C-L. 2008. Removal of sialic acid involving Klotho causes cell-surface retention of TRPV5 channel via binding to galectin-1. *Proc Natl Acad Sci USA*, 105, 9805-9810.
- Chefalo, P, Pan, Y-B, Nagy, N, Harding, C and Guo, Z-W. 2004. Preparation and immunological studies of protein conjugates of *N*-acylneuraminic acids. *Glycoconjug J*, 20, 407-414.
- Chefalo, P, Pan, Y, Nagy, N, Guo, Z and Harding, CV. 2006. Efficient metabolic engineering of GM3 on tumor cells by *N*-phenylacetyl-D-mannosamine. *Biochemistry*, 45, 3733-3739.
- Collins, BE, Fralich, TJ, Itonori, S, Ichikawa, Y and Schnaar, RL. 2000. Conversion of cellular sialic acid expression from *N*-acetyl- to *N*-glycolylneuraminic acid using a synthetic precursor, *N*-glycolylmannosamine pentaacetate: inhibition of myelin-associated glycoprotein binding to neural cells. *Glycobiology*, 10, 11-20.
- Goon, S, Schilling, B, Tullius, MV, Gibson, BW and Bertozzi, CR. 2003. Metabolic incorporation of unnatural sialic acids into *Haemophilus ducreyi* lipooligosaccharides. *Proc Natl Acad Sci USA*, 18, 3089-3094.
- Gross, HJ, Rose, U, Krause, JM, Paulson, JC, Schmid, K, Feeny, RE and Brossmer, R. 1989. Transfer of synthetic sialic acid analogues to N- and O-linked glycoprotein glycans using four different mammalian sialyltransferases. *Biochemistry*, 28, 7386-7392.
- Han, S, Collins, BE, Bengtson, P and Paulson, JC. 2005. Homo-multimeric complexes of CD22 revealed by *in situ* photoaffinity protein-glycan crosslinking. *Nat Chem Biol*, 1, 93-97.
- Hanai, N, Dohi, T, Nores, GA and Hakomori, S-I. 1988. A novel ganglioside, de-*N*-acetyl-GM3 (II3NeuNH<sub>2</sub>LacCer), acting as a strong promoter for epidermal growth factor receptor kinase and as a stimulator for cell growth. *J Biol Chem*, 263, 6296-6301.
- Jacobs, CL, Goon, S, Yarema, KJ, Hinderlich, S, Hang, HC, Chai, DH and Bertozzi, CR. 2001. Substrate specificity of the sialic acid biosynthetic pathway. *Biochemistry*, 40, 12864-12874.
- Jones, MB, Teng, H, Rhee, JK, Baskaran, G, Lahar, N and Yarema, KJ. 2004. Characterization of the cellular uptake and metabolic conversion of acetylated *N*-acetylmannosamine (ManNAc) analogues to sialic acids. *Biotechnol Bioeng*, 85, 394-405.
- Kannagi, R. 2002. Regulatory roles of carbohydrate ligands for selectins in the homing of lymphocytes. *Curr Opin Struct Biol*, 12, 599-608.
- Kayser, H, Zeitler, R, Kannicht, C, Grunow, D, Nuck, R and Reutter, W. 1992. Biosynthesis of a nonphysiological sialic acid in different rat organs, using *N*-propanoyl-D-hexosamines as precursors. *J Biol Chem*, 267, 16934-16938.

- Keppler, OT, Horstkorte, R, Pawlita, M, Schmidt, C and Reutter, W. 2001. Biochemical engineering of the *N*-acyl side chain of sialic acid: biological implications. *Glycobiology*, 11, 11R-18R.
- Kim, EJ, Sampathkumar, S-G, Jones, MB, Rhee, JK, Baskaran, G and Yarema, KJ. 2004. Characterization of the metabolic flux and apoptotic effects of *O*-hydroxyl- and *N*-acetylmannosamine (ManNAc) analogs in Jurkat (human T-lymphoma-derived) cells. *J Biol Chem*, 279, 18342-18352.
- Kosa, RE and Gross, HJ. 1993. Modification of cell surfaces by enzymatic introduction of special sialic acid analogues. *Biochem Biophys Res Commun*, 190, 914-920.
- Kuro-o, M. 2009. Klotho and aging. *Biochim Biophys Acta*, Epub ahead of print, doi:10.1016/j.bbagen.2009.1002.1005
- Lemieux, GA, Yarema, KJ, Jacobs, CL and Bertozzi, CR. 1999. Exploiting differences in sialoside expression for selective targeting of MRI contrast reagents. *J Am Chem Soc*, 121, 4278-4279.
- Luchansky, SJ, Goon, S and Bertozzi, CR. 2004. Expanding the diversity of unnatural cell-surface sialic acids. *ChemBioChem*, 5, 371-374.
- Mahal, LK, Yarema, KJ and Bertozzi, CR. 1997. Engineering chemical reactivity on cell surfaces through oligosaccharide biosynthesis. *Science*, 276, 1125-1128.
- Mitsuoka, C, Ohmori, K, Kimura, N, Kanamori, A, Komba, S, Ishida, H, Kiso, M and Kannagi, R. 1999. Regulation of selectin binding activity by cyclization of sialic acid moiety of carbohydrate ligands on human leukocytes. *Proc Natl Acad Sci USA*, 96, 1597-1602.
- Oetke, C, Brossmer, R, Mantey, LR, Hinderlich, S, Isecke, R, Reutter, W, Keppler, OT and Pawlita, M. 2002. Versatile biosynthetic engineering of sialic acid in living cells using synthetic sialic acid analogues. *J Biol Chem*, 277, 6688-6695.
- Pan, Y, Ayani, T, Nadas, J, Wen, S and Guo, Z. 2004. Accessibility of *N*-acyl-D-mannosamines to *N*-acetyl-D-neuraminic acid aldolase. *Carbohydr Res*, 339, 2091-2100.
- Sampathkumar, S-G, Jones, MB, Meledeo, MA, Campbell, CT, Choi, SS, Hida, K, Gomutputra, P, Sheh, A, Gilmartin, T, Head, SR and Yarema, KJ. 2006a. Targeting glycosylation pathways and the cell cycle: sugar- dependent activity of butyrate-carbohydrate cancer prodrugs. *Chem Biol*, 13, 1265-1275.
- Sampathkumar, S-G, Li, AV, Jones, MB, Sun, Z and Yarema, KJ. 2006b. Metabolic installation of thiols into sialic acid modulates adhesion and stem cell biology. *Nat Chem Biol*, 2, 149-152.
- Sampathkumar, S-G, Li, AV and Yarema, KJ. 2006c. Synthesis of non-natural ManNAc analogs for the expression of thiols on cell surface sialic acids. *Nat Protoc*, 1, 2377-2385.
- Saxon, E and Bertozzi, CR. 2000. Cell surface engineering by a modified Staudinger reaction. *Science*, 287, 2007-2010.
- Saxon, E, Luchansky, SJ, Hang, HC, Yu, C, Lee, SC and Bertozzi, CR. 2002. Investigating cellular metabolism of synthetic azidosugars with the Staudinger ligation. *J Am Chem Soc*, 124, 14893-14902.
- Tanaka, Y and Kohler, JJ. 2008. Photoactivatable crosslinking sugars for capturing glycoprotein interactions. *J Am Chem Soc*, 130, 3278-3279.
- Tangvoranuntakul, P, Gagneux, P, Diaz, S, Bardor, M, Varki, N, Varki, A and Muchmore, E. 2003. Human uptake and incorporation of an immunogenic nonhuman dietary sialic acid. *Proc Natl Acad Sci USA*, 100, 12045-12050.
